# Supplementary material
Source: MDPI journal article supplement (https://www.mdpi.com/2073-4344/13/1/124)
Supplement: s1 [file s1 › catalysts-2059678-supplementary.pdf]

# Molecular Dynamics Simulations for the Michaelis Complex of Ectoine Synthase (EctC)

Justyna Andrys-Olek, Johann Heider and Tomasz Borowski

## Supplementary Materials

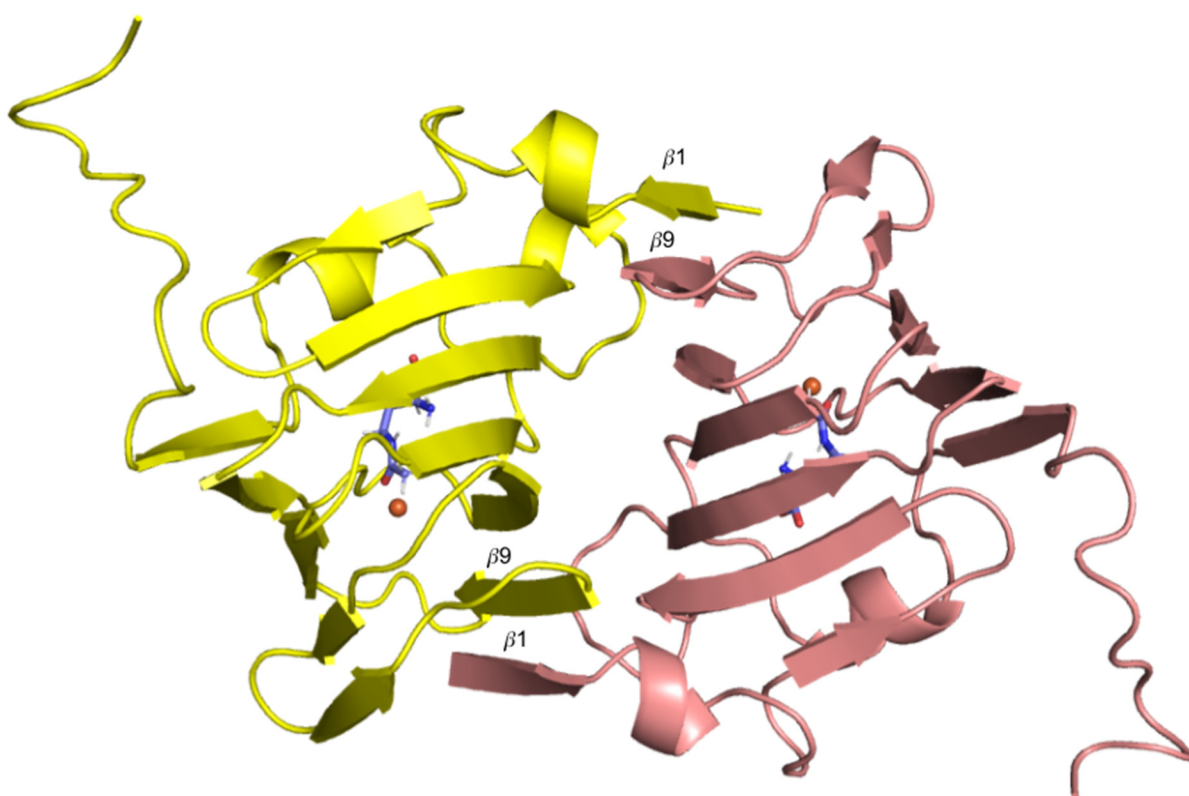

Figure S1. Ectoine synthase dimer from *P. Lautus* (PDB: 5ONN) with both monomers occupied by the ligand molecules. Interface of dimerization marked with labels of interacting  $\beta$ -strands.

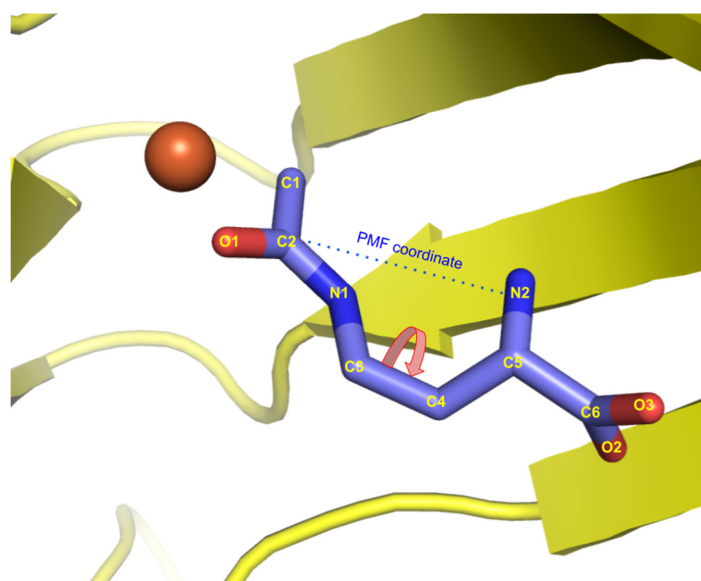

Figure S2. The substrate geometry from the 5ONN crystal structure. Atoms labelled and PMF reaction coordinate (C2-N2 distance) indicated with blue dotted line. N1-C3-C4-C5 dihedral marked with a red bent arrow.

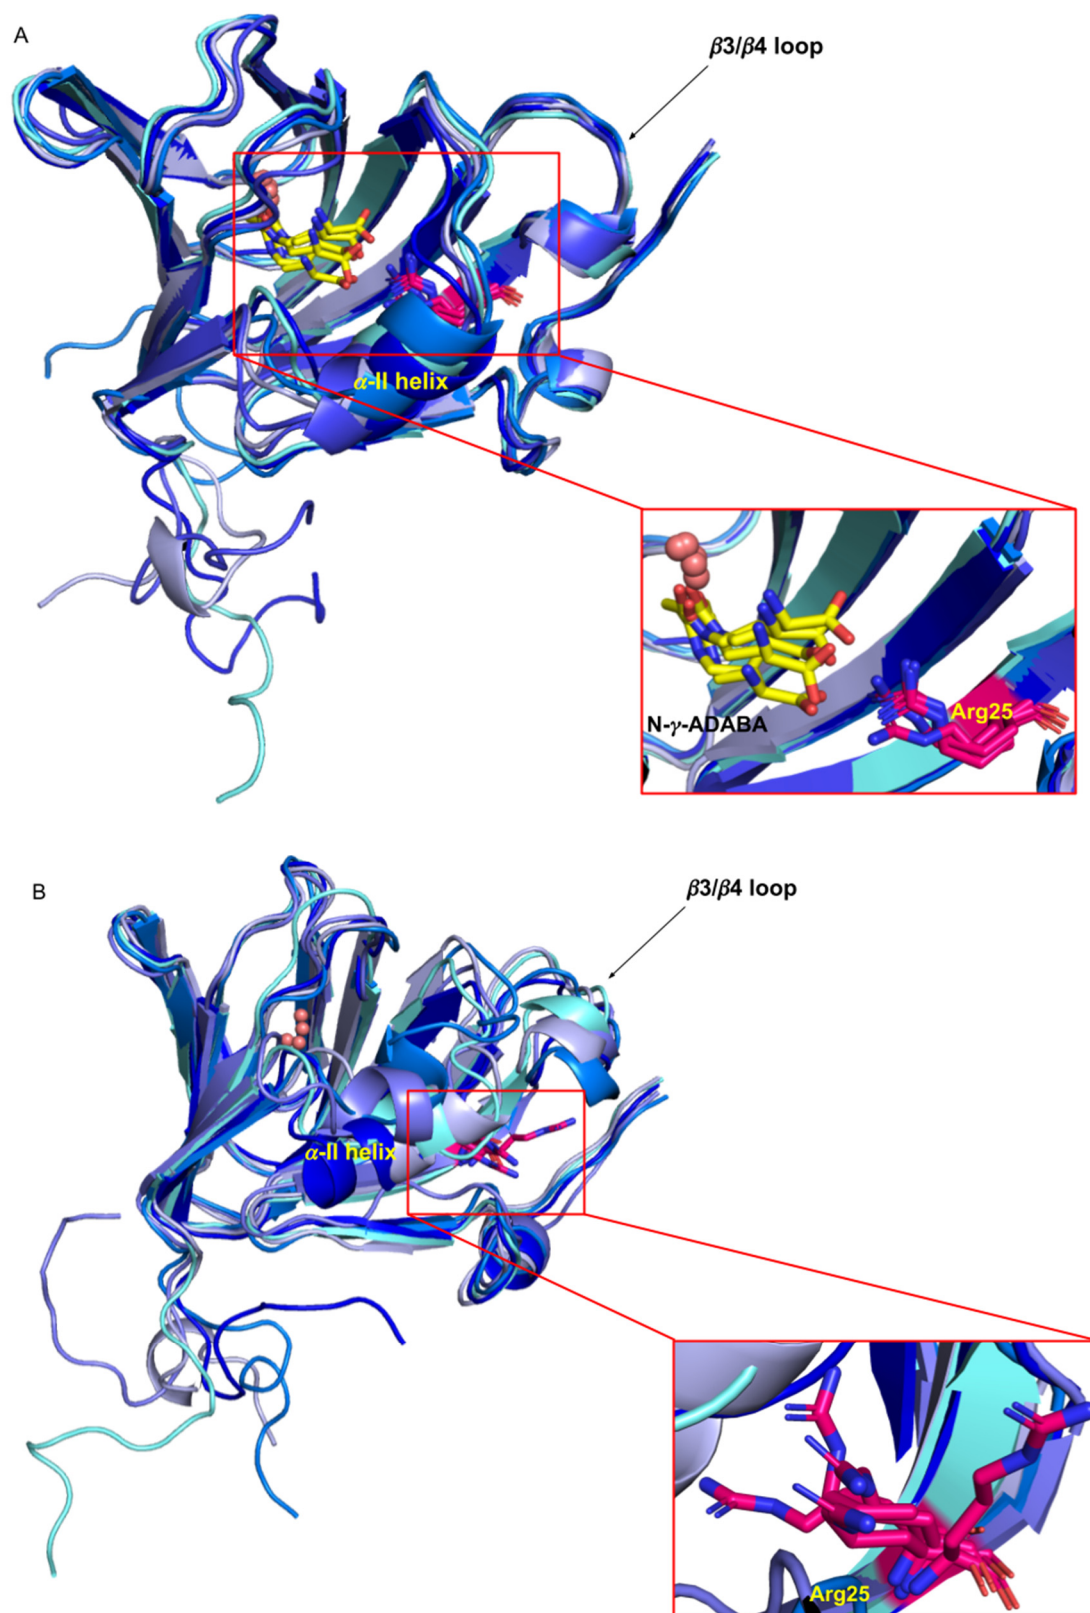

Figure S3. Structural alignment of five centroid geometries for the occupied (A) and empty (B) EctC monomers. A: Zoom into the Arg25-N- $\gamma$ -ADABA mutual orientation. B: zoom into the multiple orientations of Arg25.

#### C2-N2 distance in substrate molecules in bonded model (Trp21-A)

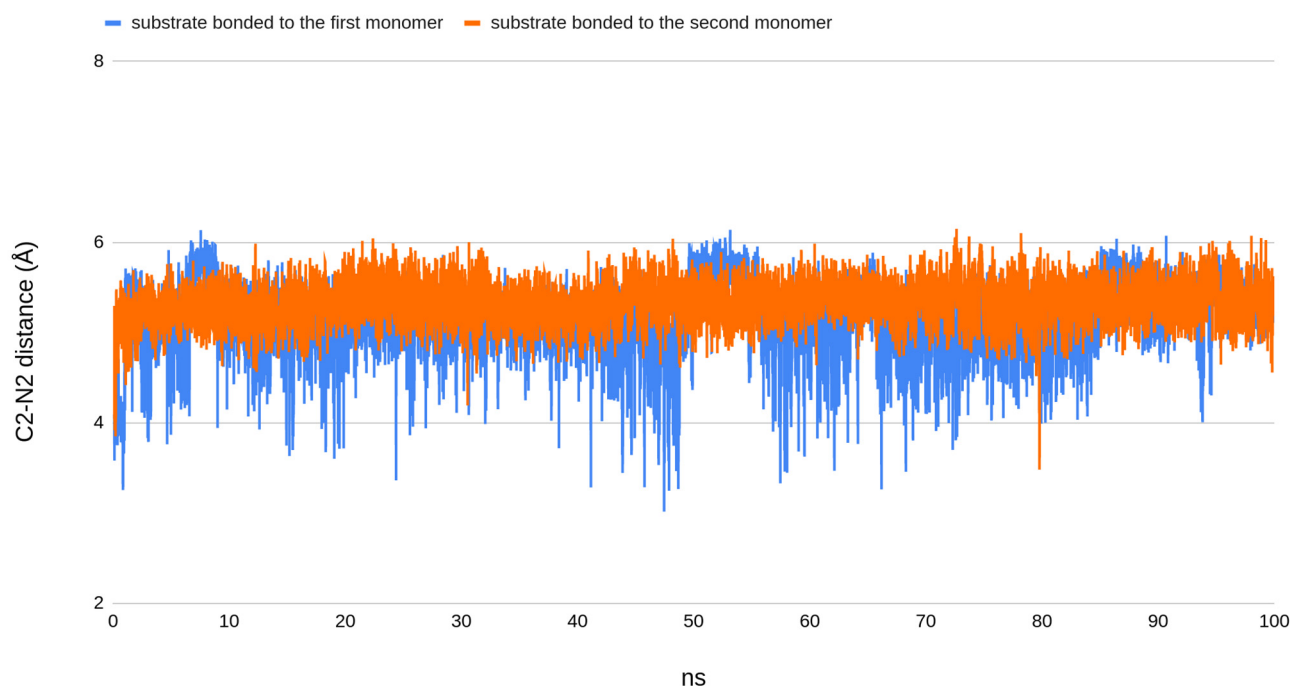

#### C2-N2 distance in substrate molecules in bonded model (Trp21-B)

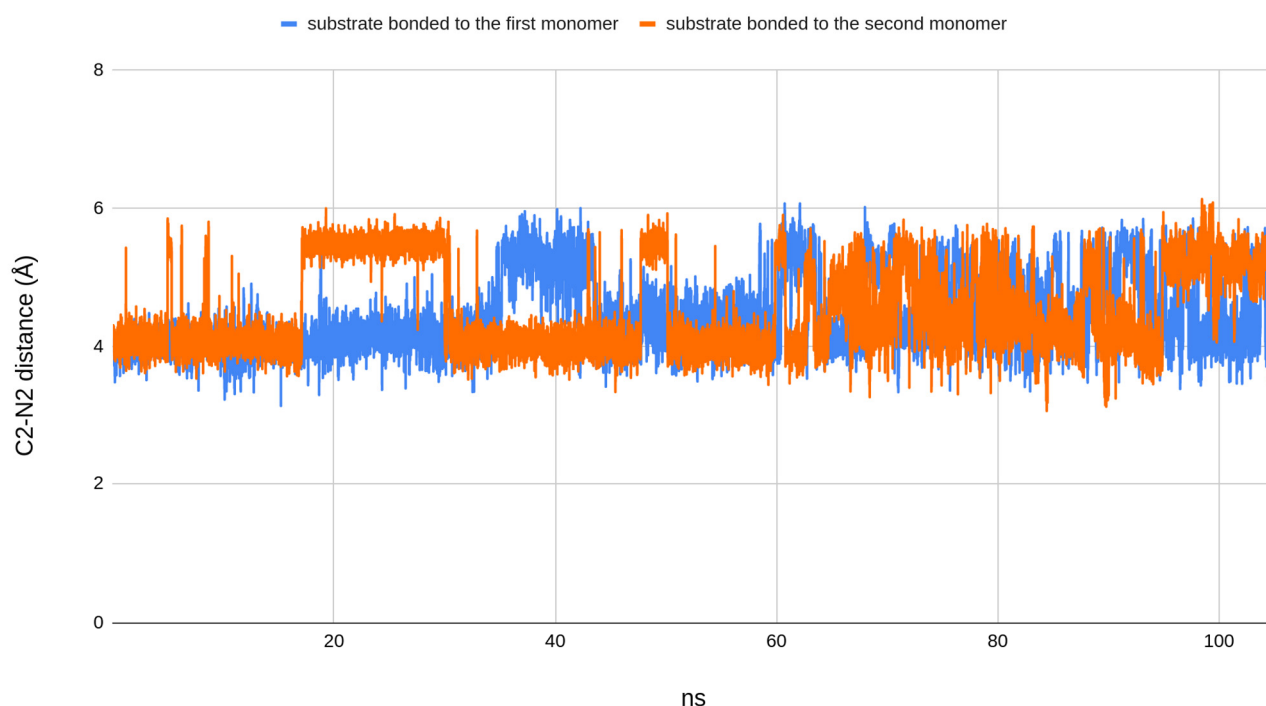

Figure S4. Graph of the C2-N2 distance in N- $\gamma$ -ADABA molecules bonded to both monomers in the EctC dimer for the model  $\gamma$  with the Trp21-A or Trp21-B conformation. **Top:** Graph of the C2-N2 distance in N- $\gamma$ -ADABA molecules bonded to both  $\gamma$  monomers in the EctC dimer for the model with the **Trp21-A** conformation. **Bottom:** Graph of the C2-N2 distance in N- $\gamma$ -ADABA molecules bonded to both monomers in the EctC dimer for the model with the **Trp21-B** conformation. The measurements were extracted from the 100 ns long MD simulations for the bonded model with tetrahedral geometry around  $\text{Fe}^{2+}$ .

### $C\alpha$ - $C\beta$ - $C\gamma$ - $N\epsilon$ dihedral in Trp21

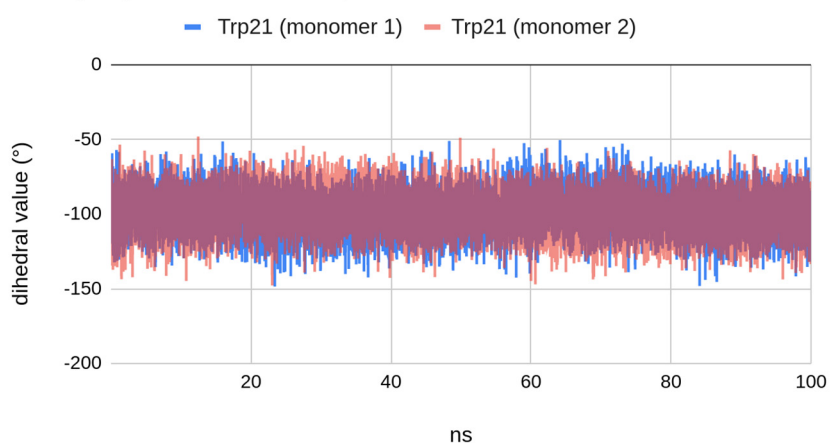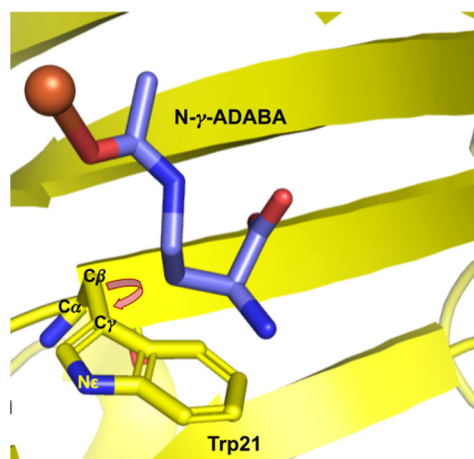

Figure S5. Conformation of Trp21 in MD for 4-coordinate bonded model. **Left:** the  $C\alpha$ - $C\beta$ - $C\gamma$ - $N\epsilon$  dihedral values calculated for Trp21 in both monomers in MD for 4-coordinate bonded model. **Right:** Trp21 in the Trp21-A conformation with the  $C\alpha$ - $C\beta$ - $C\gamma$ - $N\epsilon$  dihedral marked with red bent arrow.

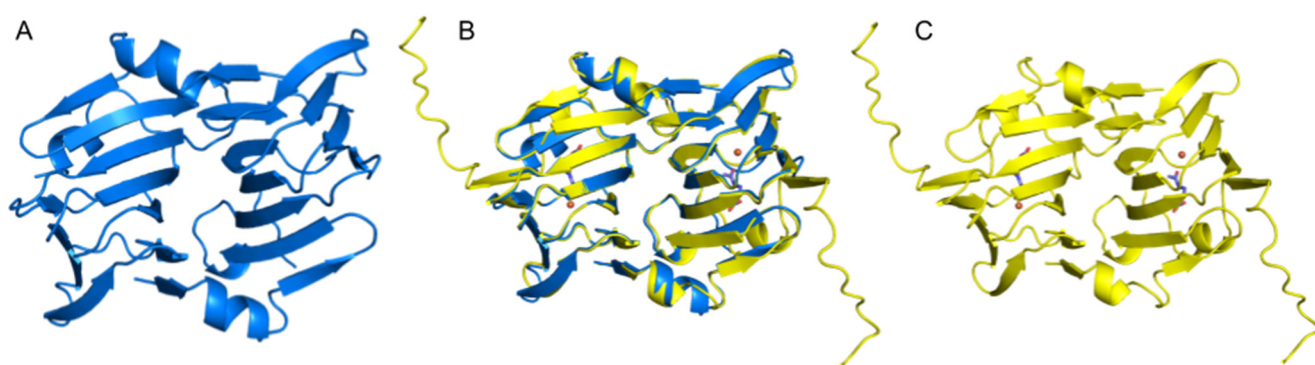

Figure S6. The homology modelling of *P/EctC* dimer. (A) The homology modelling template, EctC from *S. alaskensis*. PDB:5BXX [2](DOI:10.2210/pdb5BXX/pdb). (B) Structural alignment of the template (blue) and new model (yellow). (C) Two 5ONN monomers sequentially aligned with both monomers from the 5BXX dimer resulting in a new 5ONN dimer.

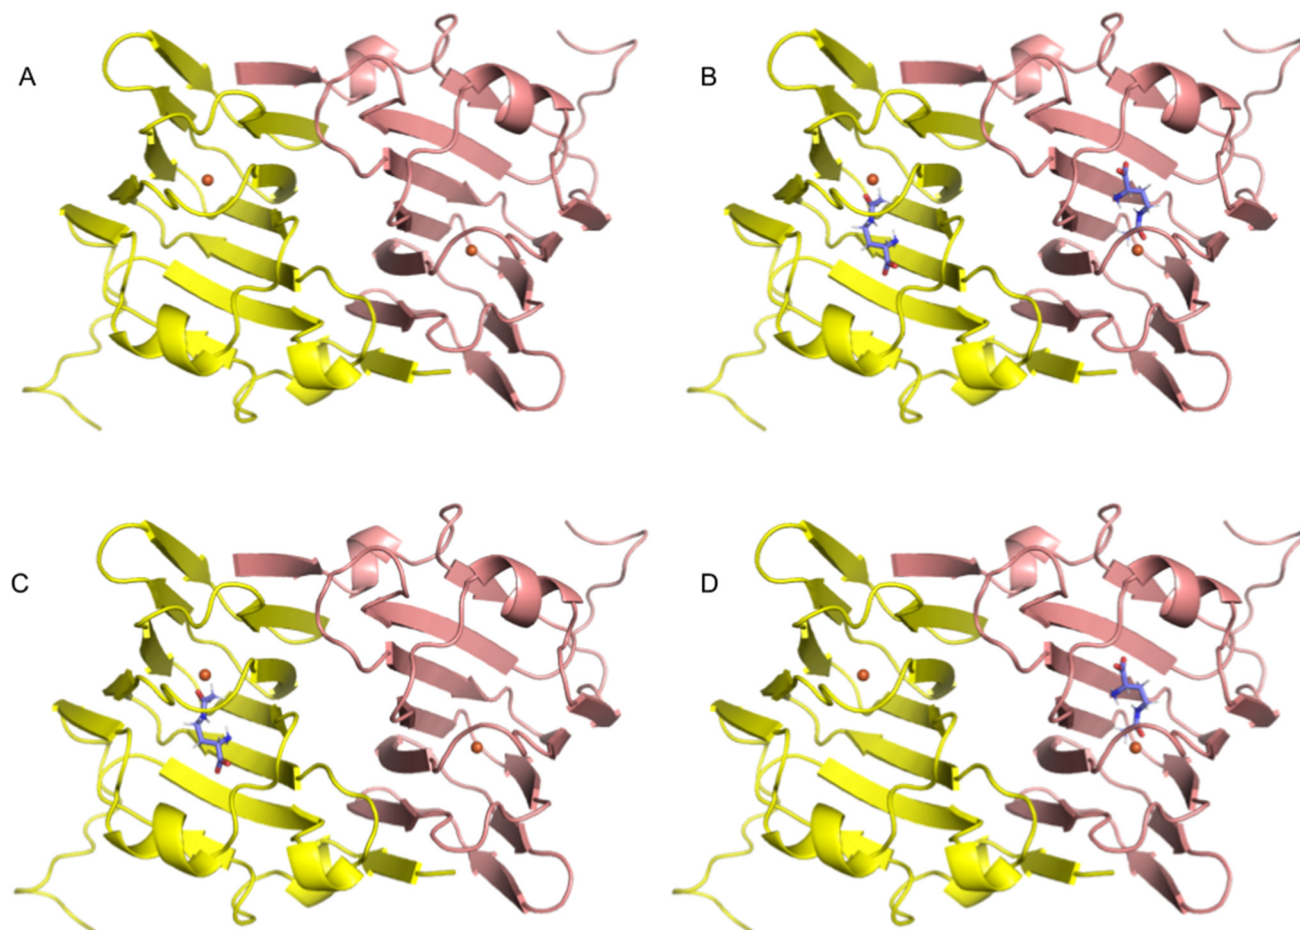

Figure S7. 6-coordinate  $\text{Fe}^{2+}$  models of EctC dimer with different monomer occupations: (A) both monomers empty, (B) both monomers occupied, (C) monomer A occupied; monomer B empty, (D) monomer A empty; monomer B occupied.

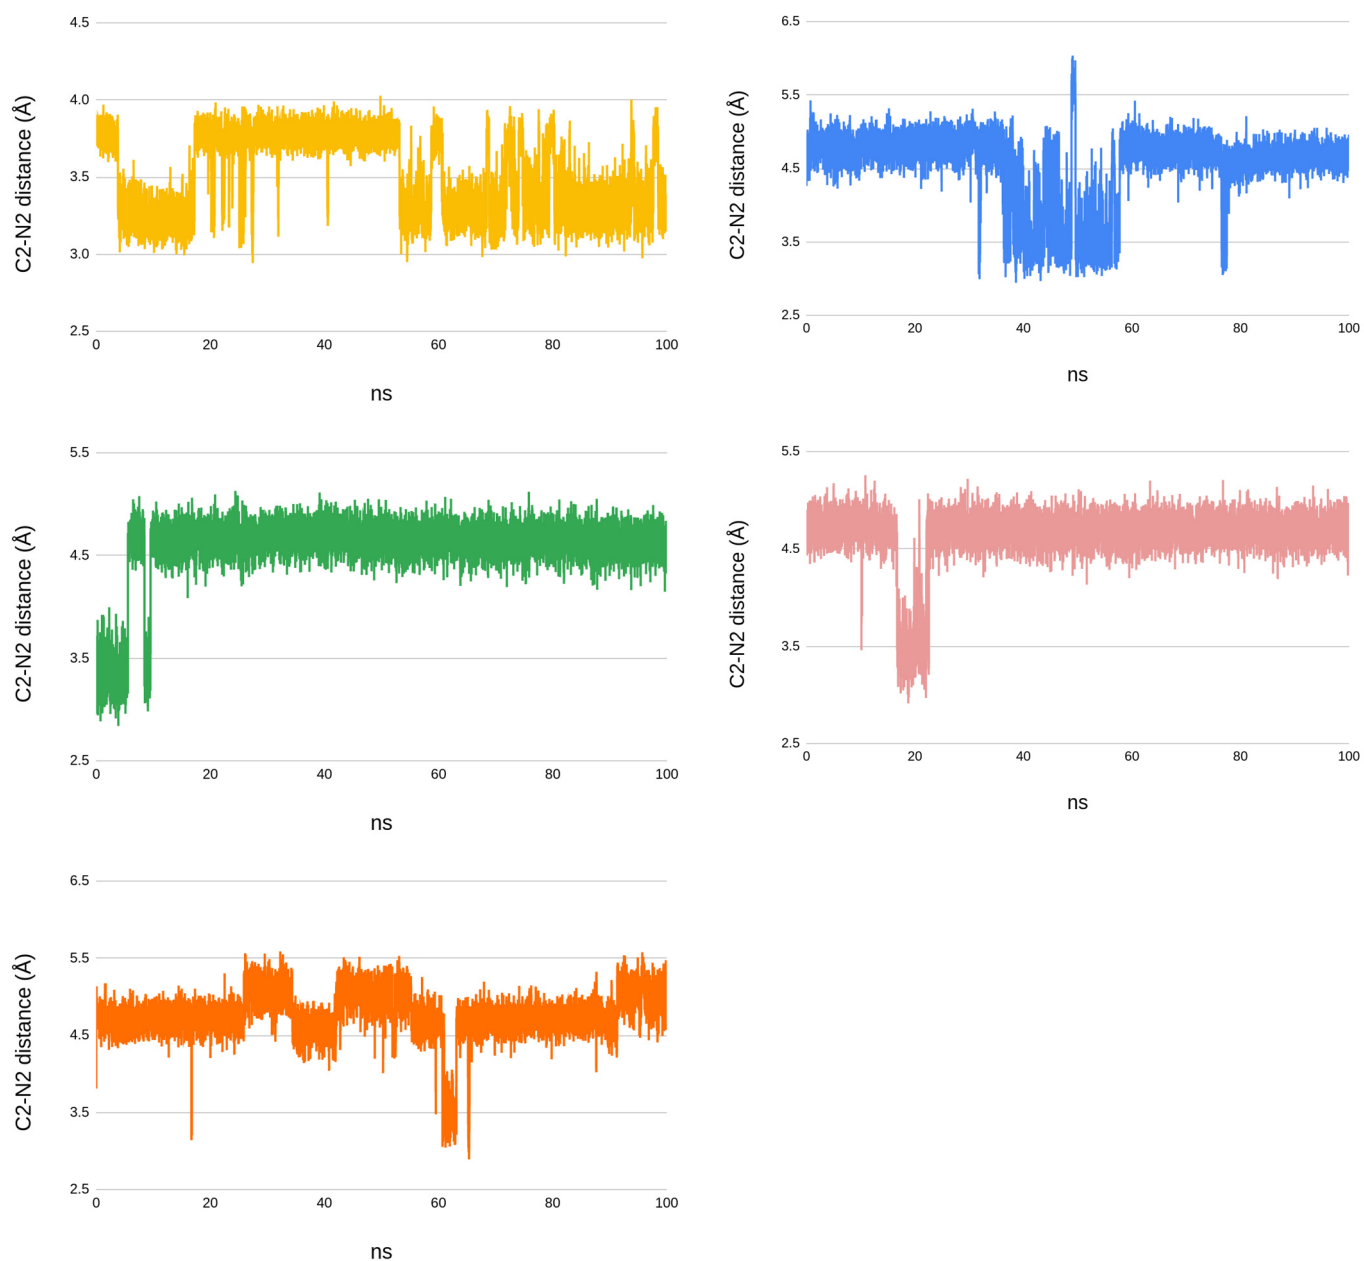

Figure S8. Graphs of the C2-N2 distances for MD trajectories for the dimers with at least one monomer in a form of the Michaelis complex. Some NAC states (C2-N2 oscillates around 3.2 Å) persisted for long periods during the simulation (yellow, blue) and some lasted shorter (green, pink, orange).

$\text{C}\alpha\text{-C}\beta\text{-C}\gamma\text{-N}\epsilon$  dihedral in Trp21 - both monomers in holo form (1)

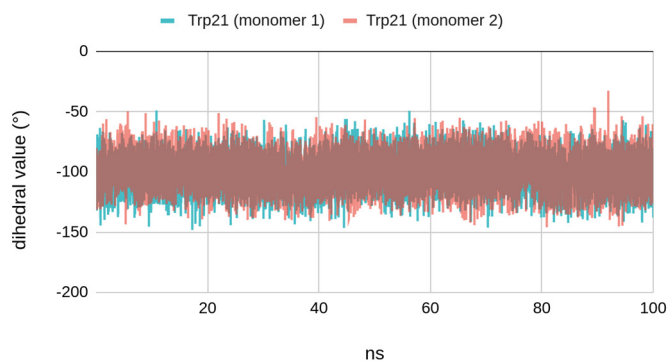

$\text{C}\alpha\text{-C}\beta\text{-C}\gamma\text{-N}\epsilon$  dihedral in Trp21 - both monomers in holo form (2)

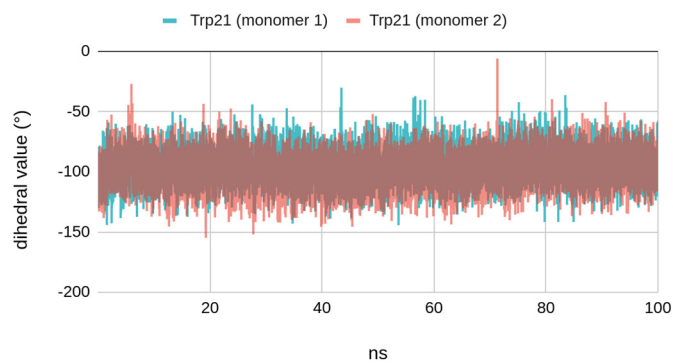

$\text{C}\alpha\text{-C}\beta\text{-C}\gamma\text{-N}\epsilon$  dihedral in Trp21 - both monomers in holo form (3)

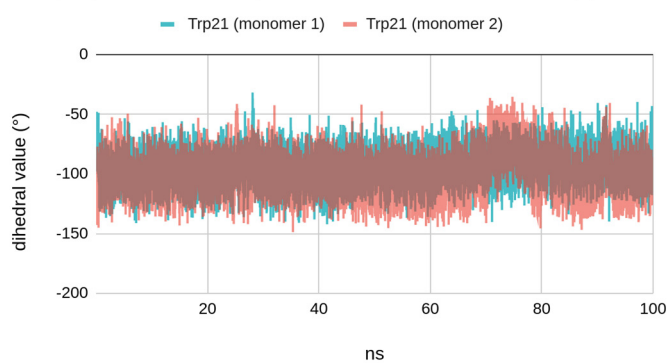

$\text{C}\alpha\text{-C}\beta\text{-C}\gamma\text{-N}\epsilon$  dihedral in Trp21 - both monomers with N- $\gamma$ -ADABA bound (1)

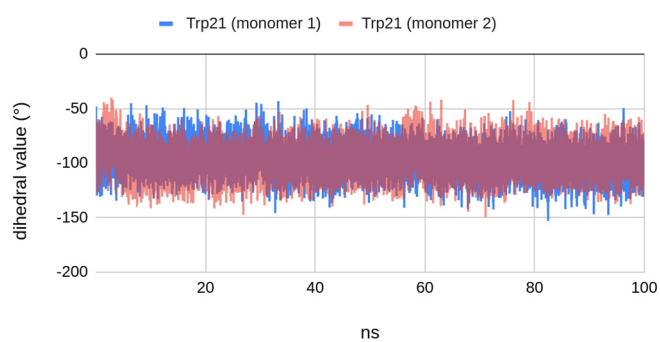

$\text{C}\alpha\text{-C}\beta\text{-C}\gamma\text{-N}\epsilon$  dihedral in Trp21 - both monomers with N- $\gamma$ -ADABA bound (2)

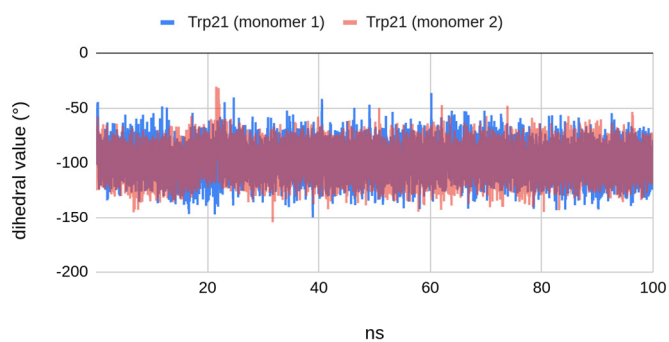

$\text{C}\alpha\text{-C}\beta\text{-C}\gamma\text{-N}\epsilon$  dihedral in Trp21 - both monomers with N- $\gamma$ -ADABA bound (3)

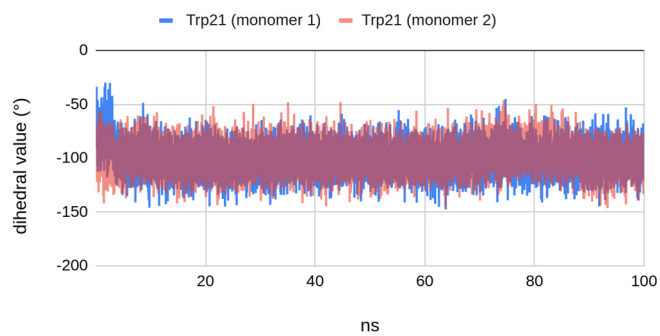

$\text{C}\alpha\text{-C}\beta\text{-C}\gamma\text{-N}\epsilon$  dihedral in Trp21 - monomer 1 with N- $\gamma$ -ADABA bound. monomer 2 in holo form (1)

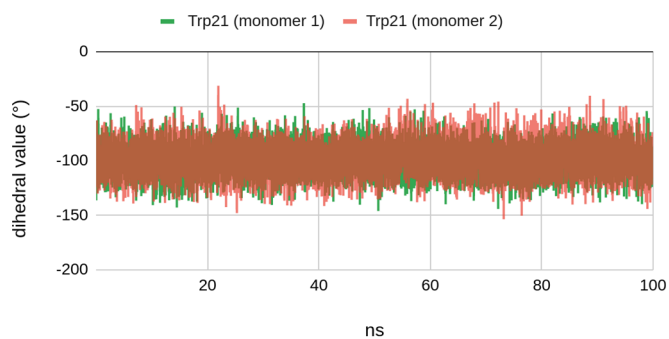

$\text{C}\alpha\text{-C}\beta\text{-C}\gamma\text{-N}\epsilon$  dihedral in Trp21 - monomer 1 with N- $\gamma$ -ADABA bound. monomer 2 in holo form (2)

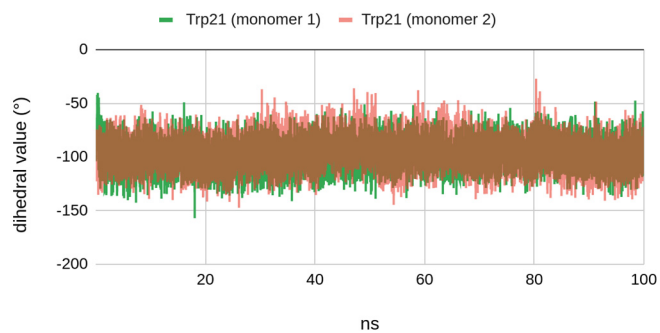

$C\alpha-C\beta-C\gamma-N\epsilon$  dihedral in Trp21 - monomer 1 with N- $\gamma$ -ADABA bound. monomer 2 in holo form (3)

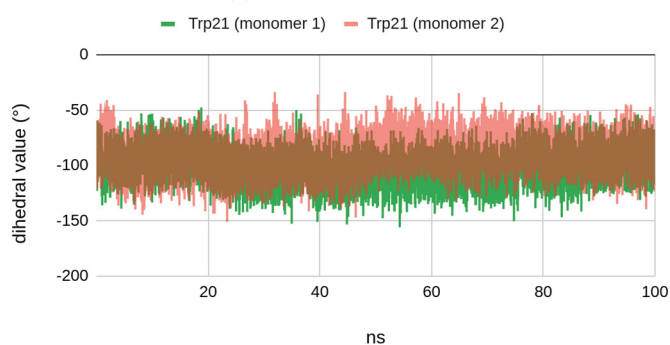

$C\alpha-C\beta-C\gamma-N\epsilon$  dihedral in Trp21 - monomer 1 in holo form. monomer 2 with N- $\gamma$ -ADABA bound (1)

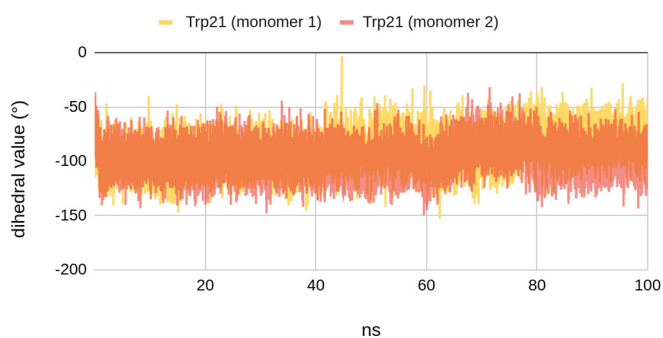

$C\alpha-C\beta-C\gamma-N\epsilon$  dihedral in Trp21 - monomer 1 in holo form. monomer 2 with N- $\gamma$ -ADABA bound (2)

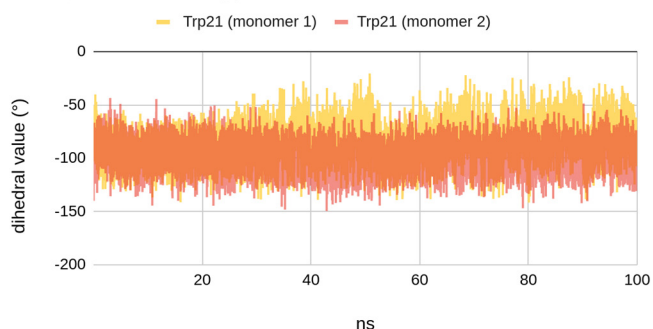

$C\alpha-C\beta-C\gamma-N\epsilon$  dihedral in Trp21 - monomer 1 in holo form. monomer 2 with N- $\gamma$ -ADABA bound (3)

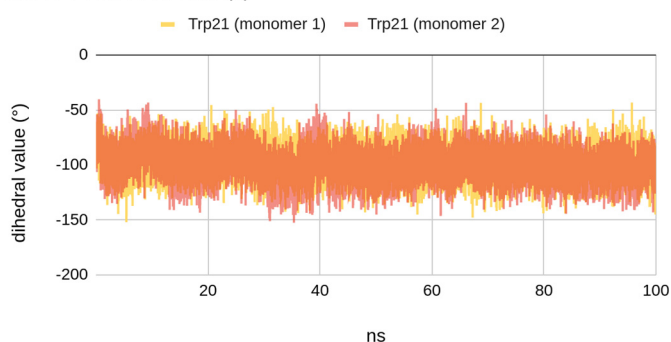

Figure S9. The  $C\alpha-C\beta-C\gamma-N\epsilon$  dihedral values for Trp21 in MD simulations for the 6-coordinate  $Fe^{2+}$  models of EctC dimer. The  $C\alpha-C\beta-C\gamma-N\epsilon$  dihedral values calculated for Trp21-A in both monomers in all twelve MD simulations for the 6-coordinate  $Fe^{2+}$  models of EctC dimer: first 3 MD for the model with both monomers empty, then 3 MD for the model with both monomers occupied, then 3 MD for the model with the first monomer occupied/second empty and last 3 MD for the model with the first monomer empty/second occupied. Trp-A conformation has values around  $-100$  deg; Trp-B around  $+90$  deg.

# $C\alpha-C\beta-C\gamma-N\epsilon$ dihedral in Trp21

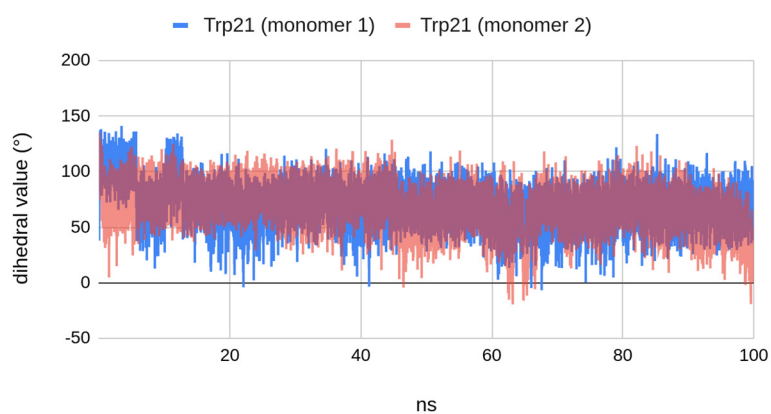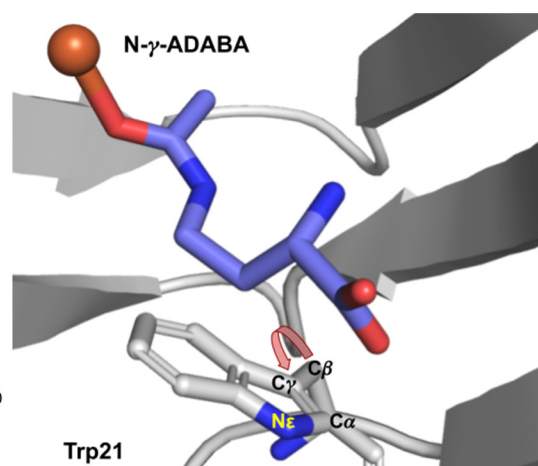

Figure S10. Conformation of Trp21(B) in MD for 4-coordinate bonded model. **Left:**  $C\alpha-C\beta-C\gamma-N\epsilon$  dihedral values for Trp21-B (both EctC monomers) in MD trajectories for 4-coordinate  $Fe^{2+}$  model. **Right:** Trp21 in the Trp21-B conformation with  $C\alpha-C\beta-C\gamma-N\epsilon$  dihedral marked with the red bent arrow.

$\alpha$ -C $\beta$ -C $\gamma$ -N $\epsilon$  dihedral in Trp21 - both monomers in holo form (1)

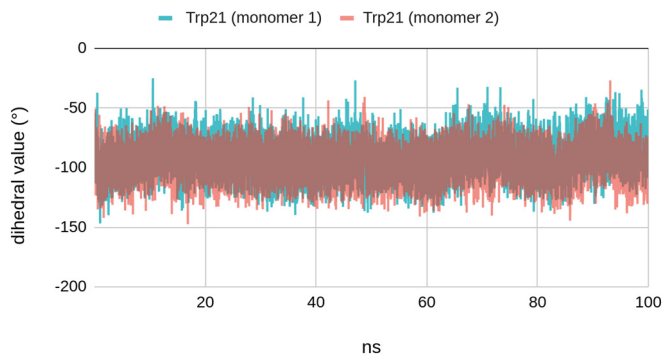

$\alpha$ -C $\beta$ -C $\gamma$ -N $\epsilon$  dihedral in Trp21 - both monomers in holo form (2)

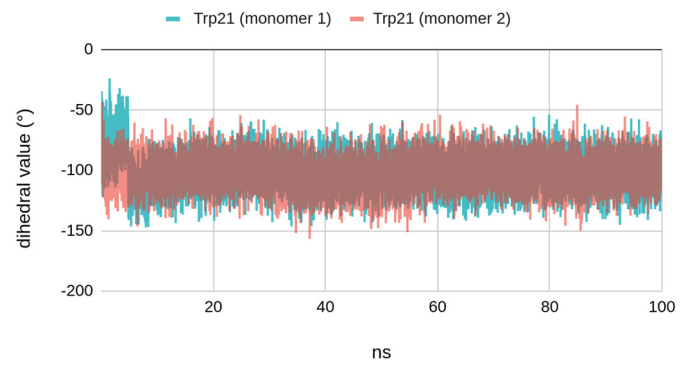

$\alpha$ -C $\beta$ -C $\gamma$ -N $\epsilon$  dihedral in Trp21 - both monomers in holo form (3)

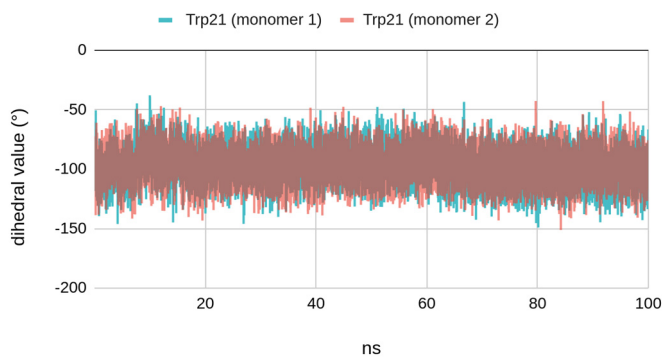

$\alpha$ -C $\beta$ -C $\gamma$ -N $\epsilon$  dihedral in Trp21 - both monomers with N- $\gamma$ -ADABA bound (1)

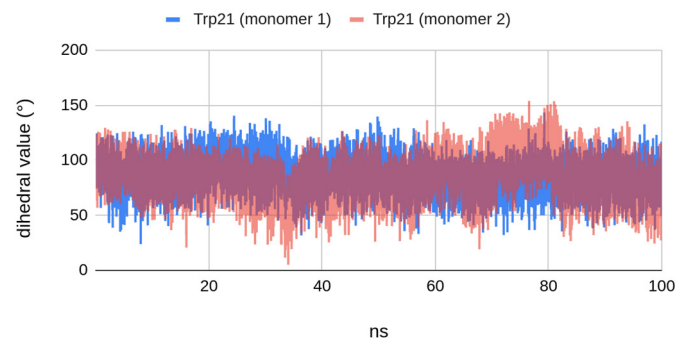

$\alpha$ -C $\beta$ -C $\gamma$ -N $\epsilon$  dihedral in Trp21 - both monomers with N- $\gamma$ -ADABA bound (2)

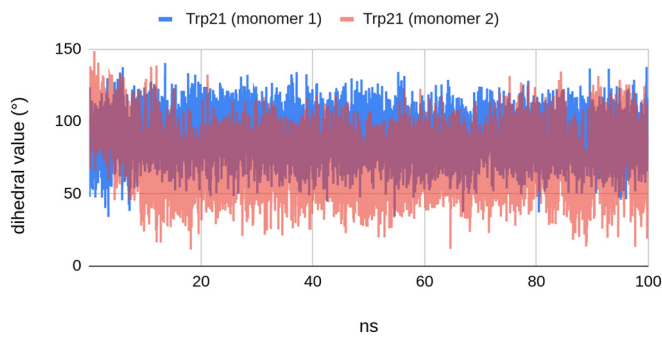

$\alpha$ -C $\beta$ -C $\gamma$ -N $\epsilon$  dihedral in Trp21 - both monomers with N- $\gamma$ -ADABA bound (3)

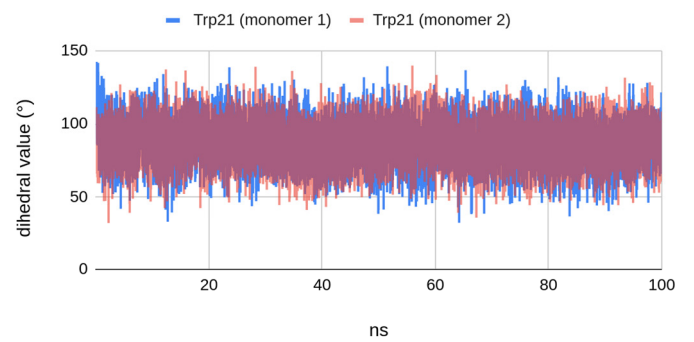

$\alpha$ -C $\beta$ -C $\gamma$ -N $\epsilon$  dihedral in Trp21 - monomer 1 with N- $\gamma$ -ADABA bound. monomer 2 in holo form (1)

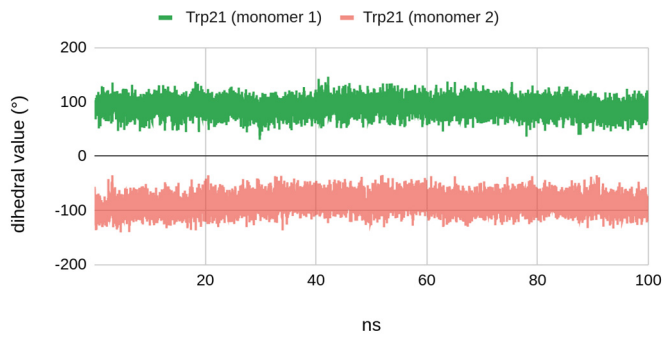

$\alpha$ -C $\beta$ -C $\gamma$ -N $\epsilon$  dihedral in Trp21 - monomer 1 with N- $\gamma$ -ADABA bound. monomer 2 in holo form (2)

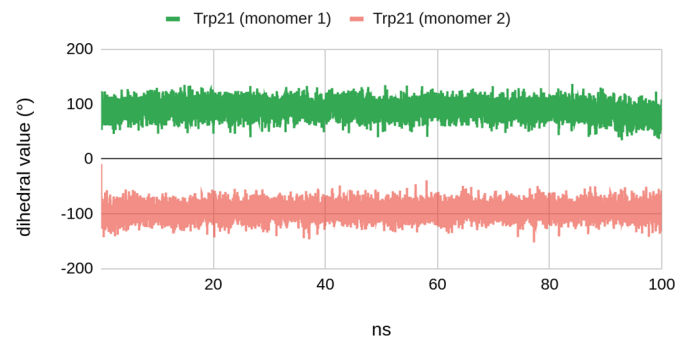

$\text{C}\alpha\text{-C}\beta\text{-C}\gamma\text{-N}\epsilon$  dihedral in Trp21 - monomer 1 with N- $\gamma$ -ADABA bound. monomer 2 in holo form (3)

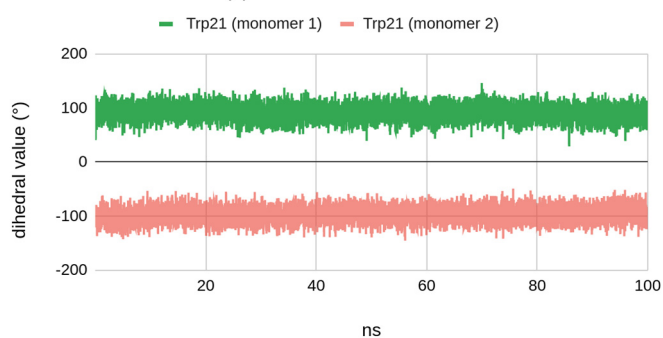

$\text{C}\alpha\text{-C}\beta\text{-C}\gamma\text{-N}\epsilon$  dihedral in Trp21 - monomer 1 in holo form. monomer 2 with N- $\gamma$ -ADABA bound (1)

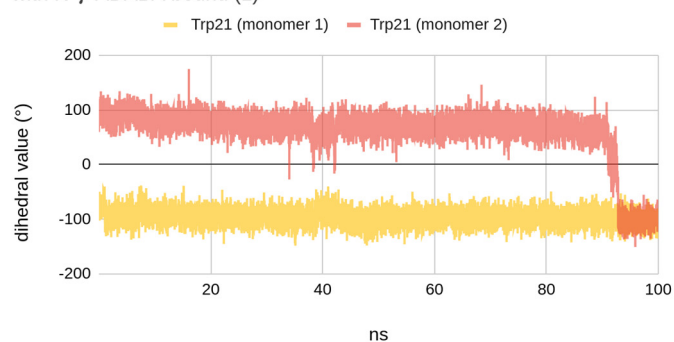

$\text{C}\alpha\text{-C}\beta\text{-C}\gamma\text{-N}\epsilon$  dihedral in Trp21 - monomer 1 in holo form. monomer 2 with N- $\gamma$ -ADABA bound (2)

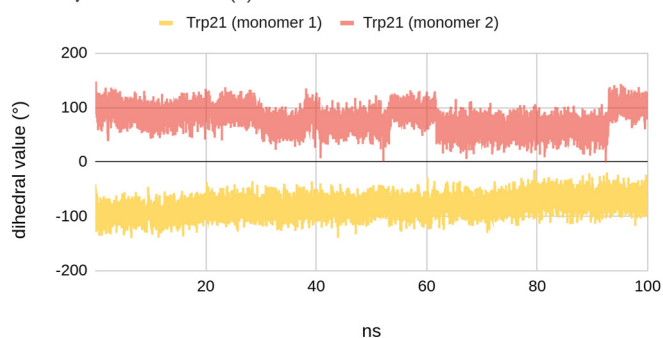

$\text{C}\alpha\text{-C}\beta\text{-C}\gamma\text{-N}\epsilon$  dihedral in Trp21 - monomer 1 in holo form. monomer 2 with N- $\gamma$ -ADABA bound (3)

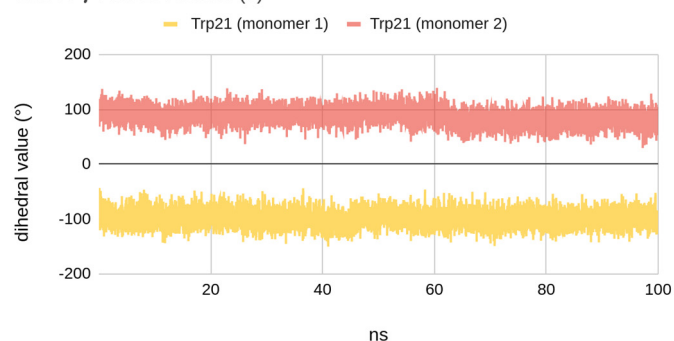

Figure S11. The  $\text{C}\alpha\text{-C}\beta\text{-C}\gamma\text{-N}\epsilon$  dihedral values for Trp21(B) in MD simulations for the 6-coordinate  $\text{Fe}^{2+}$  models of EctC dimer. The  $\text{C}\alpha\text{-C}\beta\text{-C}\gamma\text{-N}\epsilon$  dihedral values calculated for Trp21(B) in both monomers in all twelve MDs for the 6-coordinate  $\text{Fe}^{2+}$  models of EctC dimer: first 3 MD for the model with both monomers empty, then 3 MD for the model with both monomers occupied, then 3 MD for the model with the first monomer in the complex occupied/second empty and last 3 MD for the model with the first monomer empty/second occupied. Trp-A conformation has values around  $-100$  deg; Trp-B around  $+90$  deg.

Table S1. Force field (bonded model) parameters describing the geometry around Fe<sup>2+</sup> ion with tetrahedral geometry. Reference (equilibrium) values and force constants of bonds between Fe<sup>2+</sup> and its ligands are listed in the “Bond” section: O2 stands for the carboxyl oxygen of Glu57, OH for the tyrosyl oxygen of Tyr84, O for the substrate carbonyl oxygen and NB for the -nitrogen atom of His92. Analogously, the “Angle” section refers to the  $\varepsilon$  angles involving Fe<sup>2+</sup>.

| <b>BOND</b>  | <b>r_eq [Å]</b>   | <b>K [kcal/mol Å<sup>2</sup>]</b>   |
|--------------|-------------------|-------------------------------------|
| O2-FE        | 2.34              | 24.00                               |
| OH-FE        | 2.04              | 71.34                               |
| NB-FE        | 2.16              | 75.68                               |
| O-FE         | 2.41              | 24.00                               |
| <b>ANGLE</b> | <b>θ_eq [deg]</b> | <b>K [kcal/mol rad<sup>2</sup>]</b> |
| O2-FE-OH     | 139.57            | 13.10                               |
| O2-FE-NB     | 123.16            | 9.26                                |
| O2-FE-O      | 123.72            | 12.00                               |
| CO-O2-FE     | 136.58            | 18.13                               |
| OH-FE-NB     | 107.16            | 21.00                               |
| OH-FE-O      | 120.72            | 20.08                               |
| C-OH-FE      | 145.37            | 9.00                                |
| CV-NB-FE     | 132.59            | 3.38                                |
| NB-FE-O      | 166.47            | 3.00                                |
| CR-NB-FE     | 126.40            | 3.45                                |
| FE-O-C       | 138.13            | 14.73                               |
